# Supplementary material for: Cocoa flavanol supplementation preserves early and late radial artery function after transradial catheterization
Source: Royal Society of Chemistry journal article supplement (doi:10.1039/d3fo01116j), 2023-01-01
Supplement: d3fo01116j1.pdf [file d3fo01116j1.pdf]

**Cocoa flavanol supplementation preserves early and late radial artery function after transradial catheterization**

**Running title: Cocoa flavanols preserve artery function**

Michael Gröne\* <sup>a</sup>, Miriam Schillings\* <sup>a</sup>, Dragos Duse<sup>a</sup>, Nicolas Kramser<sup>a</sup>, Christine Quast<sup>a</sup>, Christian Heiss<sup>b</sup>, Roberto Sansone<sup>a</sup>, Christian Jung<sup>a</sup>, Malte Kelm<sup>a,c</sup>, Ralf Erkens<sup>a</sup>

<sup>a</sup> *Department of Cardiology, Pulmonology and Angiology Medical Faculty, Heinrich Heine University of Düsseldorf, Düsseldorf, Germany;* <sup>b</sup> *Department of Clinical and Experimental Medicine, Faculty of Health and Medical Science, University of Surrey, UK;* <sup>c</sup> *CARID Cardiovascular Research Institute Duesseldorf, Germany*

\* these authors contributed equally

Corresponding authors:

Christian Jung, MD, and Malte Kelm, MD

Department of Cardiology, Pulmonology, and Angiology

Medical Faculty, Heinrich Heine University of Düsseldorf

Düsseldorf, Germany

E-mail: [Christian.Jung@med.uni-duesseldorf.de](mailto:Christian.Jung@med.uni-duesseldorf.de) and [Malte.Kelm@med.uni-duesseldorf.de](mailto:Malte.Kelm@med.uni-duesseldorf.de)

Keywords: *cocoa flavanols, FMD, IMT, TCA, nutrition*

**Supplementary Information (SI):**

**SI Table 1:**

|                                           | Placebo (n = 18) |             |             |             | Flavanol (n = 18) |             |             |             |
|-------------------------------------------|------------------|-------------|-------------|-------------|-------------------|-------------|-------------|-------------|
|                                           | <i>baseline</i>  | -2 h        | +2 h        | + 6 M       | <i>baseline</i>   | -2 h        | +2 h        | + 6 M       |
| <b>primary endpoint</b>                   |                  |             |             |             |                   |             |             |             |
| intima-media thickness (mm)               | 0.37 ± 0.01      | 0.36 ± 0.01 | 0.37 ± 0.01 | 0.44 ± 0.01 | 0.36 ± 0.01       | 0.36 ± 0.01 | 0.36 ± 0.01 | 0.37 ± 0.01 |
| intima-media thickness contralateral (mm) | 0.35 ± 0.01      | 0.36 ± 0.01 | 0.36 ± 0.01 | 0.35 ± 0.01 | 0.36 ± 0.01       | 0.36 ± 0.01 | 0.37 ± 0.01 | 0.37 ± 0.01 |
| <b>secondary endpoint</b>                 |                  |             |             |             |                   |             |             |             |
| FMD (%)                                   | 8.4 ± 0.3        | 8.4 ± 0.5   | 4.3 ± 0.6   | 7.7 ± 0.4   | 9.2 ± 0.3         | 11.2 ± 0.5  | 5.9 ± 0.6   | 8.9 ± 0.4   |
| Fdc (%)                                   | 2.2 ± 0.3        | 2.0 ± 0.3   | 1.3 ± 0.3   | 1.9 ± 0.3   | 1.8 ± 0.3         | 3.2 ± 0.3   | 1.7 ± 0.3   | 2.7 ± 0.3   |
| FMD contralateral (%)                     | 8.6 ± 0.3        | 8.5 ± 0.4   | 8.0 ± 0.4   | 8.2 ± 0.3   | 8.7 ± 0.3         | 10.9 ± 0.4  | 8.8 ± 0.4   | 8.9 ± 0.3   |
| <b>tertiary endpoint</b>                  |                  |             |             |             |                   |             |             |             |
| inner diameter (mm)                       | 2.02 ± 0.09      | 2.06 ± 0.09 | 2.25 ± 0.14 | 1.95 ± 0.10 | 1.83 ± 0.08       | 1.79 ± 0.07 | 1.96 ± 0.10 | 1.77 ± 0.08 |
| outer diameter (mm)                       | 2.76 ± 0.09      | 2.79 ± 0.08 | 2.98 ± 0.13 | 2.84 ± 0.10 | 2.56 ± 0.09       | 2.52 ± 0.08 | 2.68 ± 0.13 | 2.52 ± 0.10 |

**SI Table 1:** Vascular structural and functional parameters at four time points (baseline, -2 h, +2 h, and +6 M) for the flavanol and placebo group. Values are reported as mean ± SEM; (d = days; h = hours, M = months).

**SI Table 2:**

| quaternary endpoint                                     | Placebo (n = 13) |              |              | Flavanol (n = 13) |              |              |
|---------------------------------------------------------|------------------|--------------|--------------|-------------------|--------------|--------------|
|                                                         | Baseline         | -2 h         | +2 h         | Baseline          | -2 h         | +2 h         |
| EMP CD31 <sup>+</sup> 41 <sup>-</sup> (events/ $\mu$ l) | 595 $\pm$ 28     | 585 $\pm$ 26 | 675 $\pm$ 27 | 607 $\pm$ 28      | 465 $\pm$ 26 | 628 $\pm$ 27 |
| EMP CD144 <sup>+</sup> (events/ $\mu$ l)                | 713 $\pm$ 24     | 746 $\pm$ 19 | 802 $\pm$ 35 | 749 $\pm$ 24      | 665 $\pm$ 19 | 745 $\pm$ 35 |
| EMP CD65E <sup>+</sup> (events/ $\mu$ l)                | 618 $\pm$ 21     | 601 $\pm$ 25 | 687 $\pm$ 26 | 611 $\pm$ 21      | 539 $\pm$ 25 | 651 $\pm$ 26 |

**SI Table 2:** Endothelial microparticle concentrations at three time points (baseline, -2 h, and +2 h) for the flavanol and placebo group. Values are reported as mean  $\pm$  SEM; (d = days; h = hours).

**SI Table 3:**

| Parameter                                        | Placebo        | Cocoa flavanol |
|--------------------------------------------------|----------------|----------------|
| Daily serving size                               | 4 capsules/day | 4 capsules/day |
| Total cocoa flavanols (DP 1-7) <sup>2</sup> (mg) | nd             | 1,000          |
| Total flavanol monomers <sup>3</sup> (mg)        | nd             | 220            |
| (-)-epicatechin <sup>3</sup> (mg)                | nd             | 160            |
| (+)-catechin <sup>3</sup> (mg)                   | nd             | 6.0            |
| (-)-catechin <sup>3</sup> (mg)                   | nd             | 50             |
| Calories (kcal)                                  | <5             | <5             |
| Total fat (g)                                    | <0.2           | <0.2           |
| Saturated fat (g)                                | <0.15          | <0.15          |
| Total carbohydrates (g)                          | <0.5           | <0.5           |
| Sugars (g)                                       | 0              | 0              |
| Fiber (g)                                        | <0.5           | <0.5           |
| Protein (g)                                      | <0.1           | <0.1           |
| Theobromine (mg)                                 | 100            | 100            |
| Caffeine (mg)                                    | 30             | 30             |

**SI Table 3:** Composition of daily cocoa flavanol and placebo interventions. The participants consumed 2 of capsules in the morning with breakfast and 2 at night with dinner. nd = not detected.

<sup>1</sup> Test material is not a significant source ( $\leq 1$  mg/serving) of sodium, potassium, iron, magnesium, copper, manganese, phosphorous, or calcium.

<sup>2</sup> Analysis based on AOAC 2020.05. Cocoa flavanols includes flavanol monomers and procyanidins with a degree of polymerization (DP) up to 7 units.

<sup>3</sup> Analysis based on AOAC official method. AOAC 2020.05-2020 Flavanol and Procyanidin (by Degree of Polymerization).

Available from:

[http://www.aoacofficialmethod.org/index.php?main\\_page=product\\_info&products\\_id=3046](http://www.aoacofficialmethod.org/index.php?main_page=product_info&products_id=3046)
